# Supplementary material
Source: PubMed Central journal article supplement (PMC11028542)
Supplement: 262_2014_1527_MOESM1_ESM.pdf [file 262_2014_1527_MOESM1_ESM.pdf]

**Normal Human Pancreas**

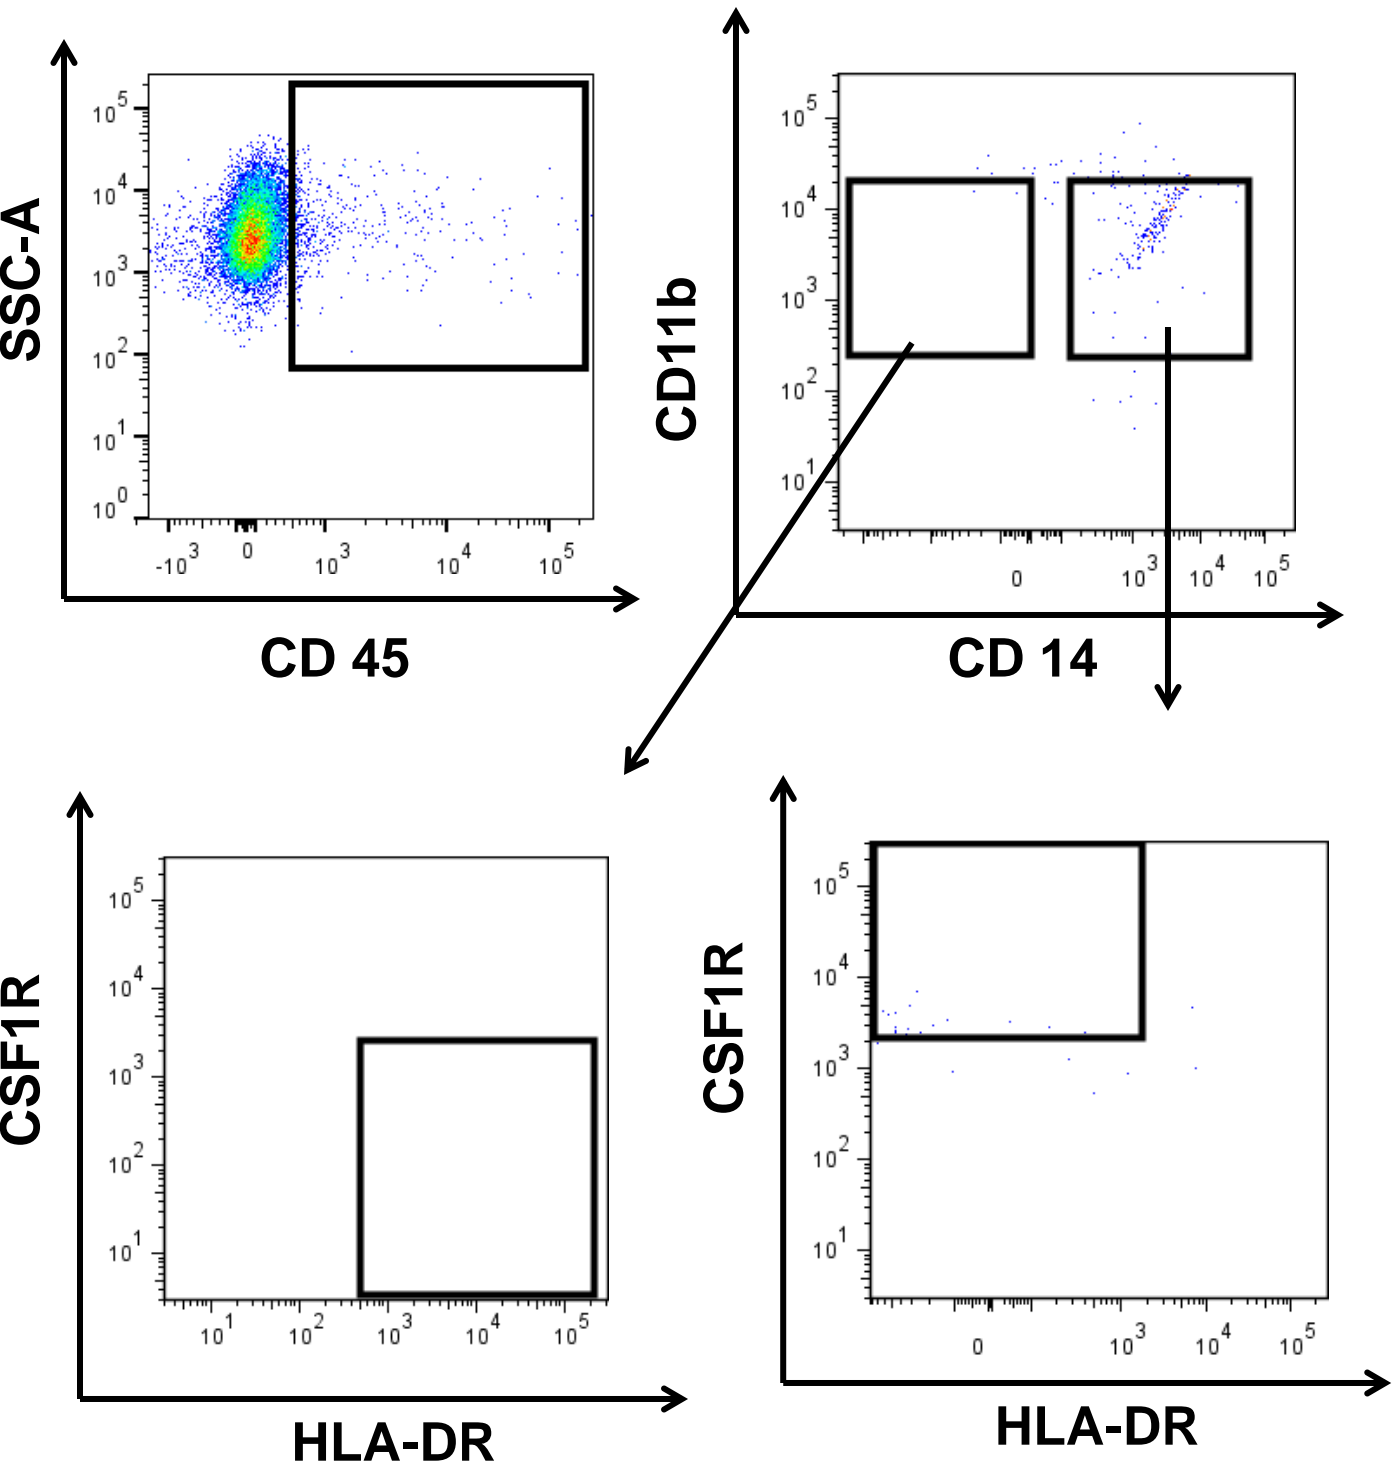

**Supplementary figure 1:** Flow cytometry performed on normal human pancreas samples (N=4). A representative flow plot shows 2.89% CD45<sup>+</sup> cells infiltrating the normal human pancreas (gating is performed using isotype control).

**NORMAL HUMAN PANCREAS (40X)**

**BROWN=CD 14**

Normal # 1

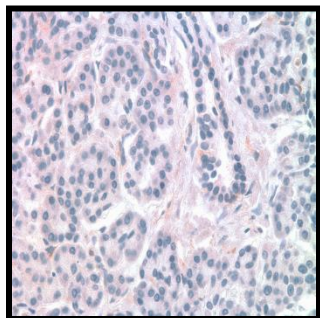

Normal # 2

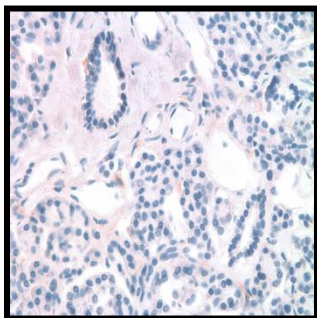

Normal # 3

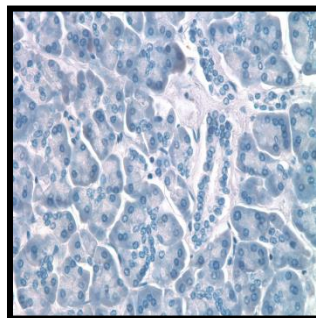

Normal # 4

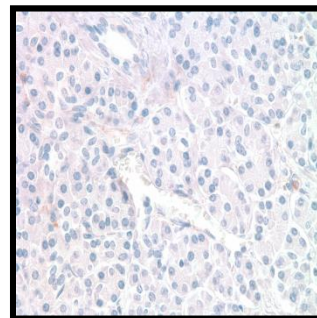

Normal # 5

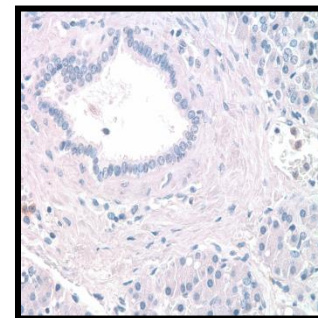

**HUMAN PANCREATIC CANCER**

PC pt # 1

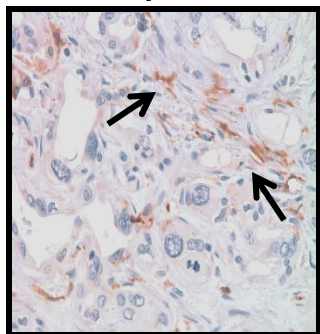

PC pt # 2

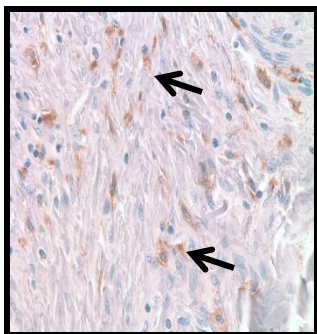

PC pt # 3

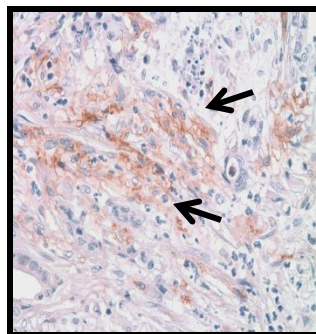

PC pt # 4

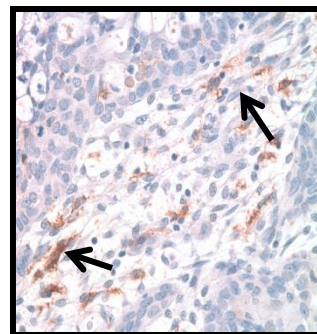

PC pt # 5

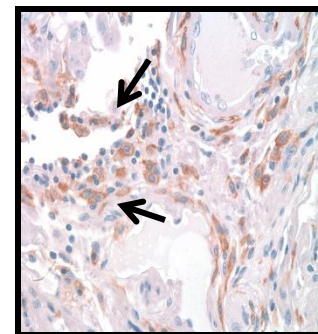

**Supplementary figure 2:** Immunohistochemistry images (40X) of PC tumor specimens (N=5) and normal human pancreas (N=5) stained for CD14<sup>+</sup> cells (Brown). Arrows point towards CD14<sup>+</sup> cells in the tumor.

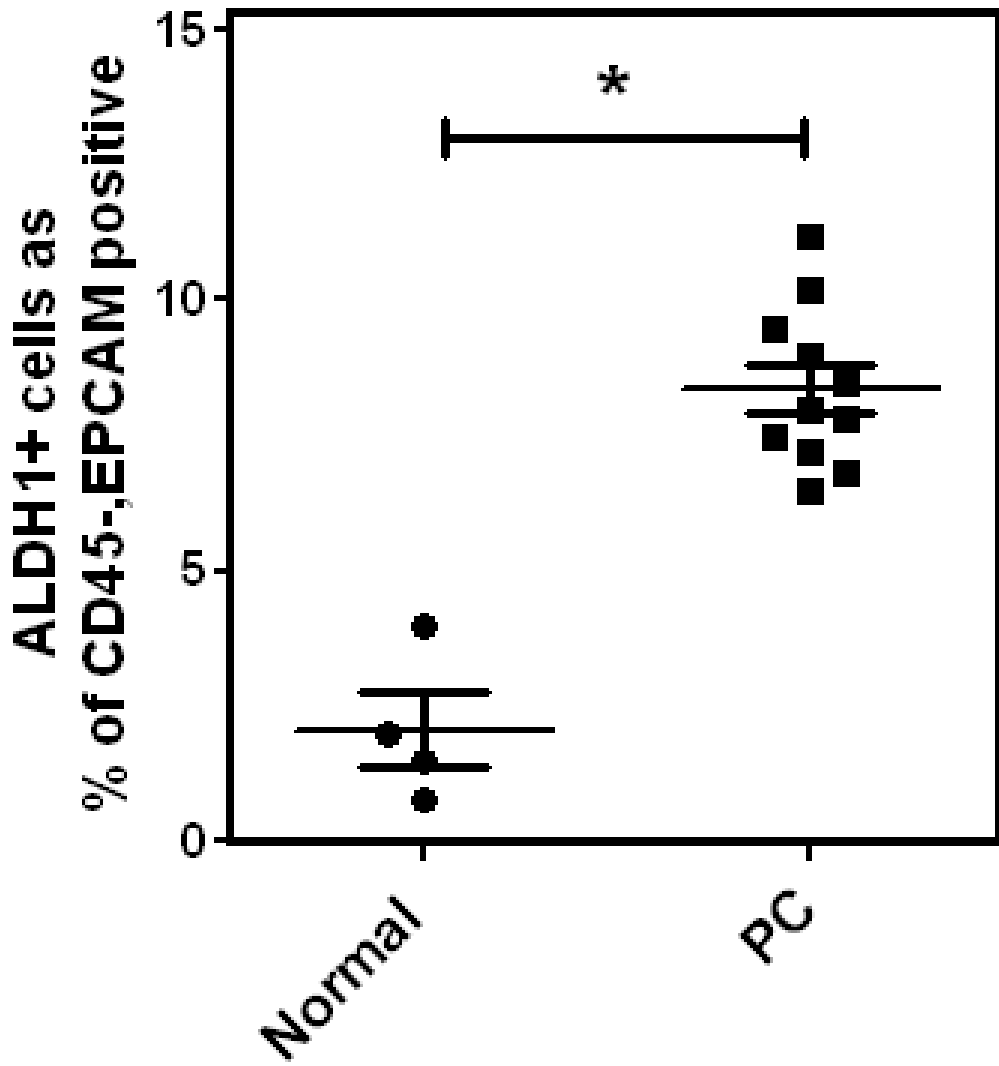

**Supplementary figure 3:**

A scatter plot comparing ALDH1<sup>Bright</sup> cells as percent of EpCAM positive cells in PC and normal human pancreas by flow cytometry. The ALDH1<sup>Bright</sup> population (as percent of EpCAM positive cells) is significantly higher in PC compared to Normal human pancreas ( $p < 0.05$  by Mann Whitney test).

## Correlation between CD14+ infiltrate and ALDH1 expression

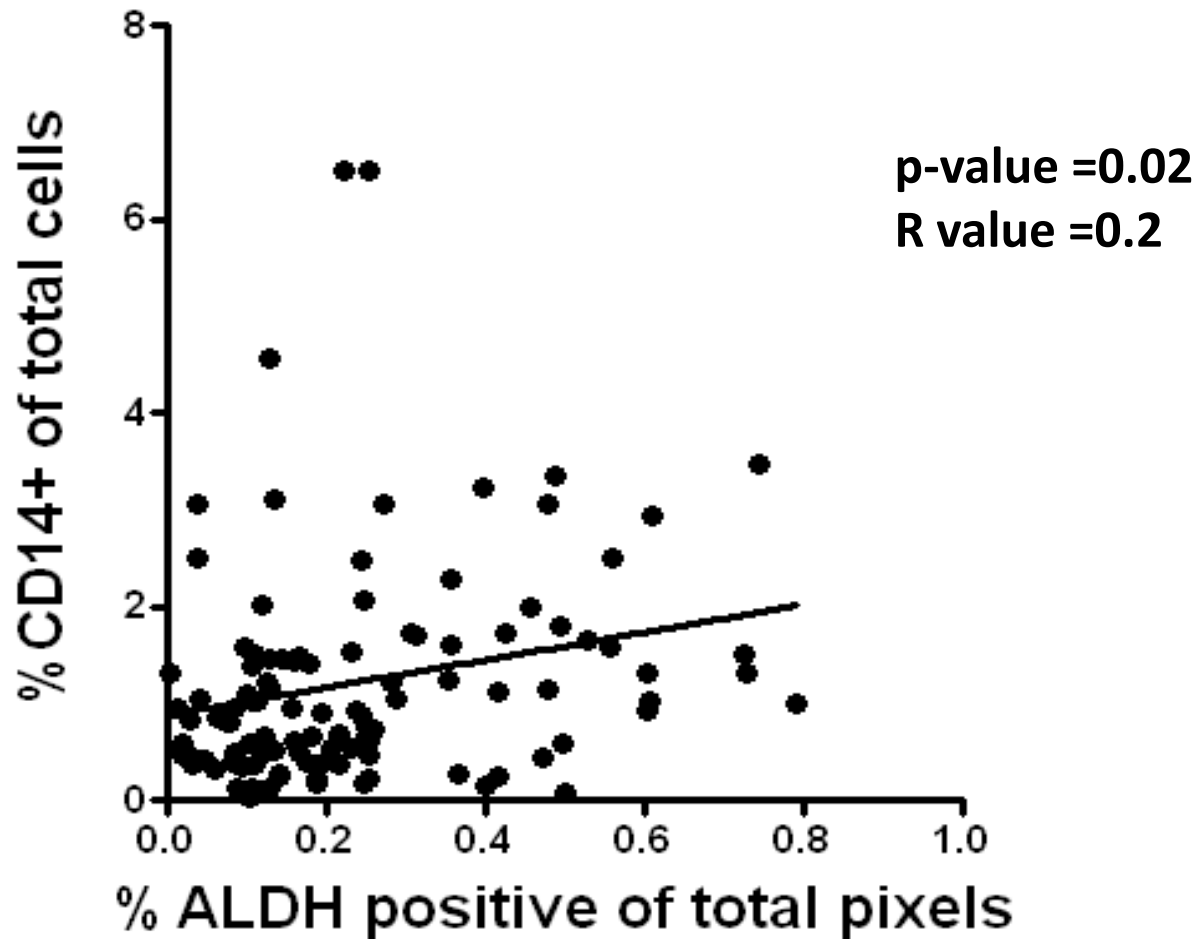

**Supplementary Figure 4:** Pearson correlation analysis shows a significant positive correlation of percent CD14<sup>+</sup> cells versus ALDH1<sup>Bright</sup> cells (Spearman  $r=0.2$ ,  $p=0.02$ ).



**Panni et. al.**  
**Supplementary figure: 5**

**RED:** Splenocytes alone  
**BLUE:** Splenocytes & TCM (GCSFR<sup>-/-</sup>)CD11b<sup>+</sup>  
**ORANGE:** Splenocytes & TCM (WT)CD11b<sup>+</sup>

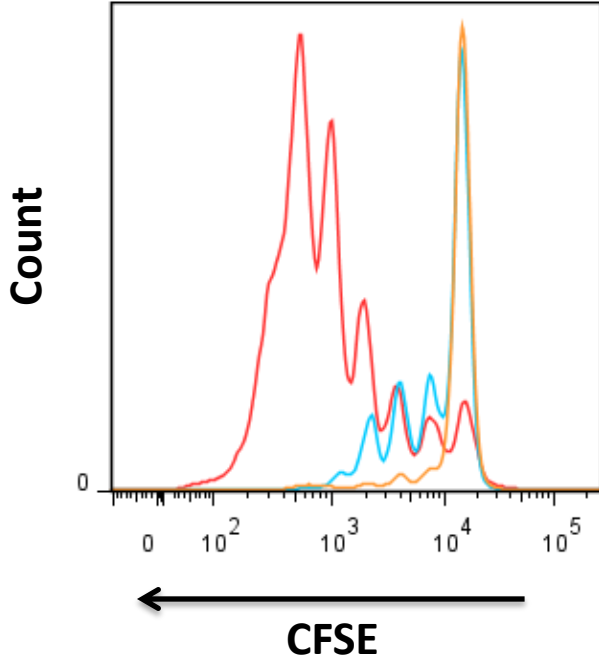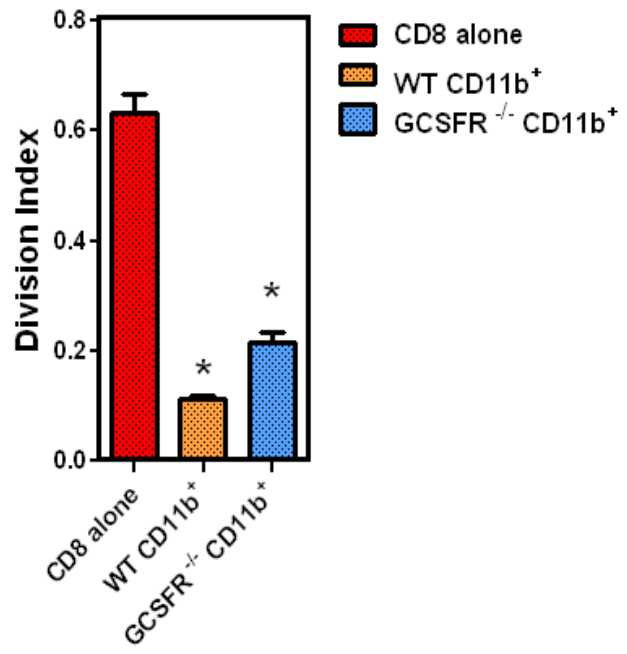

### **Supplementary Figure 5:**

Representative CFSE dilution FACS analysis of splenocytes stimulated with  $\alpha$ -CD3 and cultured alone or in the presence of tumor conditioned medium (TCM) and CD11b<sup>+</sup> cells from either GCSFR<sup>-/-</sup> or WT mice.

Graphs depict means  $\pm$  SEM with asterisk (\*) denoting statistically significant differences between groups defined as  $p < 0.05$  by Mann-Whitney test.

**Panni et. al.**  
**Supplementary Figure 6**

**A. TUMOR GROWTH CURVE**  
**(Pan02)**

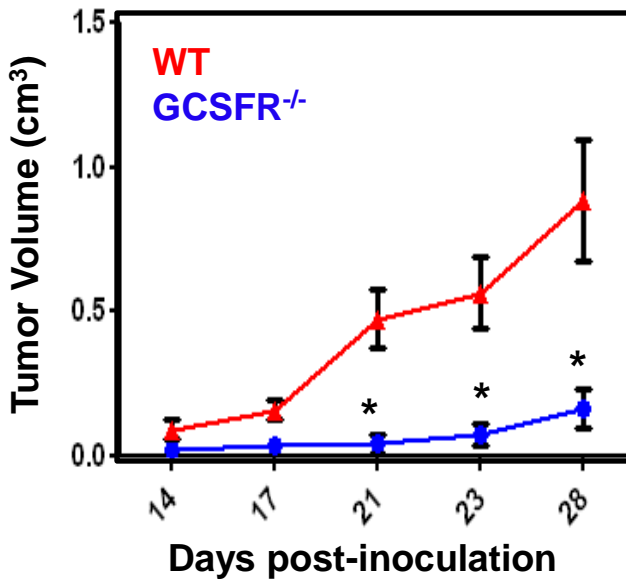

**B. TUMOR WEIGHT**  
**(Pan02)**

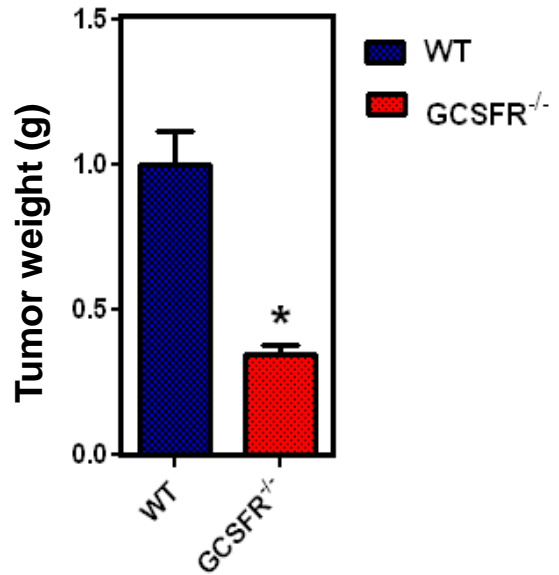

**C. TUMOR ASSOCIATED MYELOID**  
**AND LYMPHOID INFILTRATE**  
**(Pan02)**

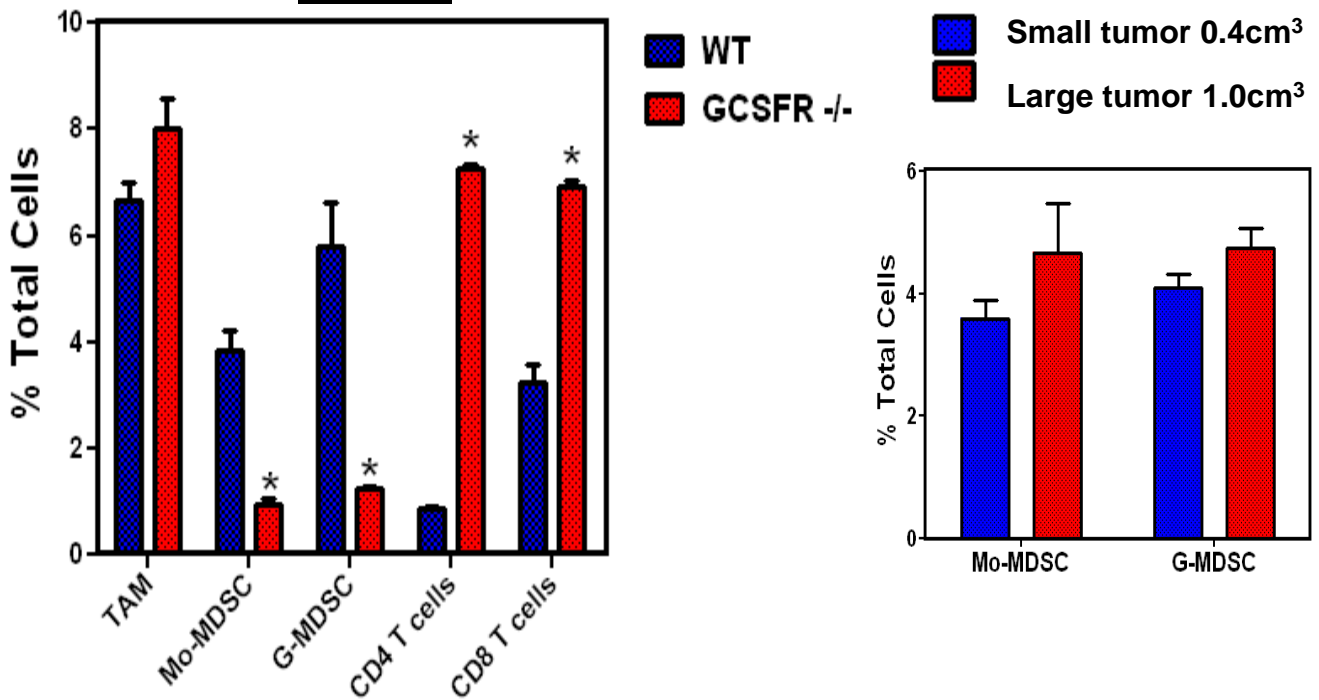

**D. MYELOID INFILTRATE IN KCM**  
**TUMORS**

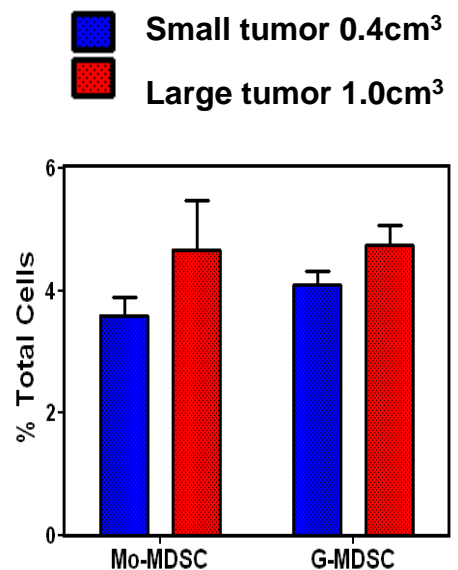

### Supplementary Figure 6:

**A.** Tumor growth curves comparing subcutaneous tumor growth, Pan02 by caliper measurements in WT mice and GCSFR<sup>-/-</sup> mice. Points on curve represent mean values ± SEM at indicated time points.

**B.** Bar graph compares tumor weights of orthotopically implanted Pan02 in WT and GCSFR<sup>-/-</sup> mice 28 days post injection.

**C.** Analysis compares tumor myeloid and lymphoid infiltrate by flow cytometry in WT and GCSFR<sup>-/-</sup>, Pan02 tumor-bearing mice. Mo-MDSC = CD11b<sup>+</sup>/Ly6C<sup>hi</sup>/Gr1<sup>+</sup>/F4/80<sup>mid</sup>, G-MDSC = CD11b<sup>+</sup>/Gr-1<sup>+</sup>/Ly6G<sup>hi</sup>/Ly6C<sup>mid</sup>, T cells = CD45<sup>+</sup>/CD3<sup>+</sup>; TAM = CD45<sup>+</sup>/CD11b<sup>+</sup>/F4/80<sup>hi</sup>/Ly6C<sup>low</sup>/MHCII<sup>+</sup>.

**D.** Analysis compares tumor myeloid infiltrate by flow cytometry in WT tumors. Blue bars show G-MDSC and Mo-MDSC in a small sized KCM tumor (volume = 0.4cm<sup>3</sup>) and red bars show myeloid cells in large tumor (volume = 1.0cm<sup>3</sup>).

Graphs depict means ± SEM with asterisk (\*) denoting statistically significant differences between groups defined as p < 0.05 by Mann-Whitney test.

**Panni et. al.**  
**Supplementary figure: 7**

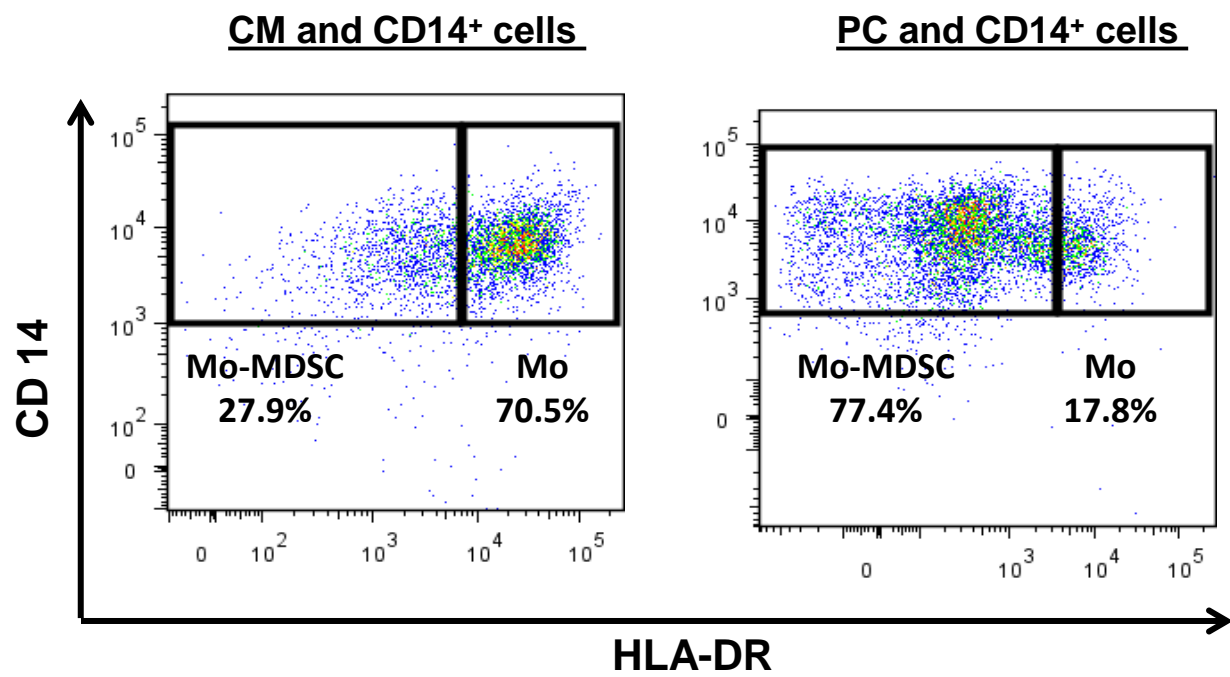

**Supplementary figure 7:** CD14<sup>+</sup> cells were isolated from normal human PBMC by magnetic bead isolation and were co-cultured with human PC cell line BxPC3 for 72 hours. Downregulation of HLA-DR expression after tumor exposure; flow-cytometry was performed on CD14<sup>+</sup> cells (from blood) after 72 hours of co-culture with tumor cells. Representative plots show that approximately 70.5% CD14<sup>+</sup> cells had high HLA-DR expression when these cells are incubated in complete medium (CM). After tumor exposure, these cells downregulate HLA-DR expression and 77.4% CD14<sup>+</sup> cells have low HLA-DR expression.

**SUBCUTANEOUS TUMOR GROWTH CURVE**

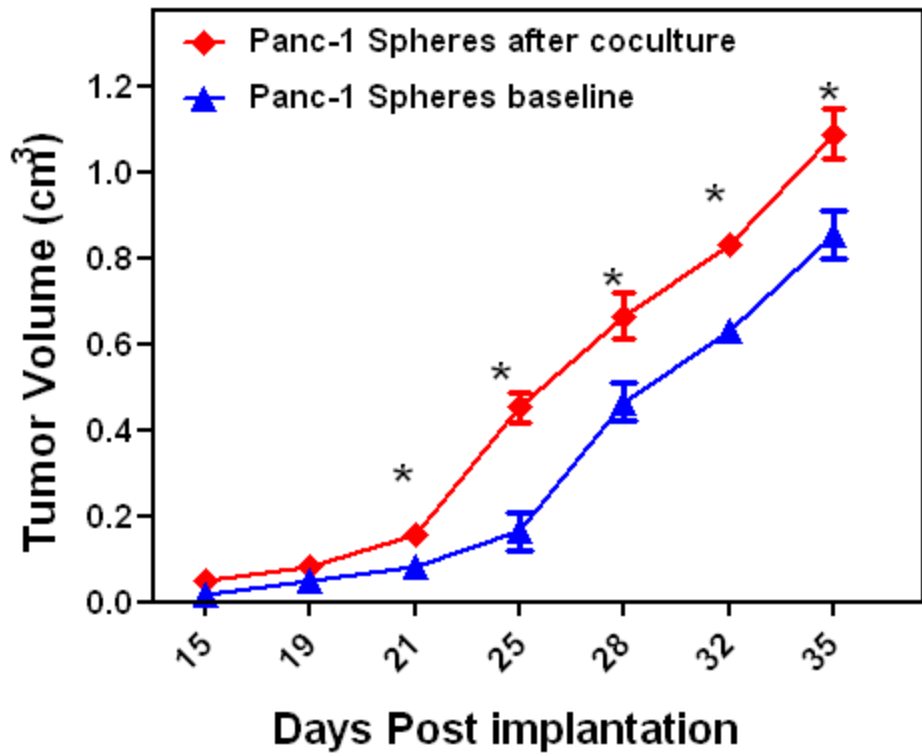

**Supplementary Figure 8:** Tumor growth curves comparing subcutaneous tumor growth, Panc-1 spheres (with baseline ALDH1 activity) and Panc-1 spheres after co-culture (increased ALDH1 activity) by caliper measurements in NU/J mice. Points on curve represent mean values  $\pm$  SEM are indicated time points.



**Panni et. al.**  
**Supplementary Figure 9**

**A.**

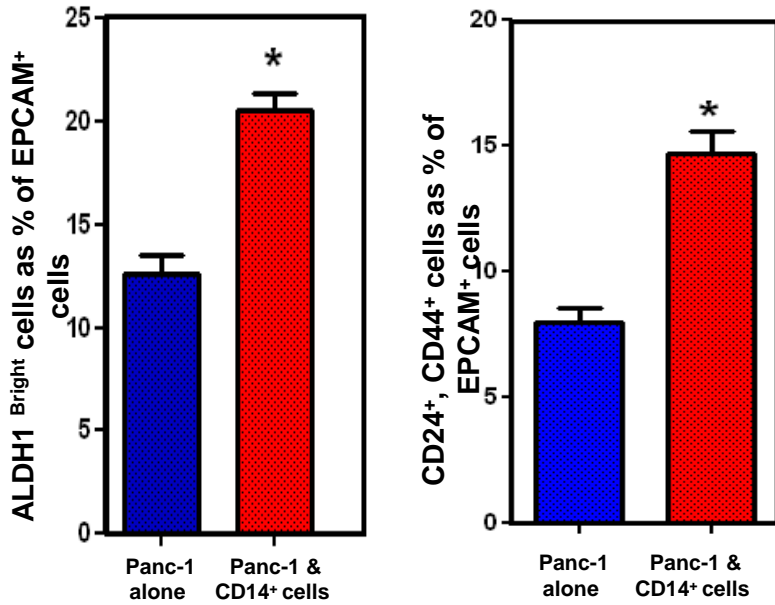

**B.**

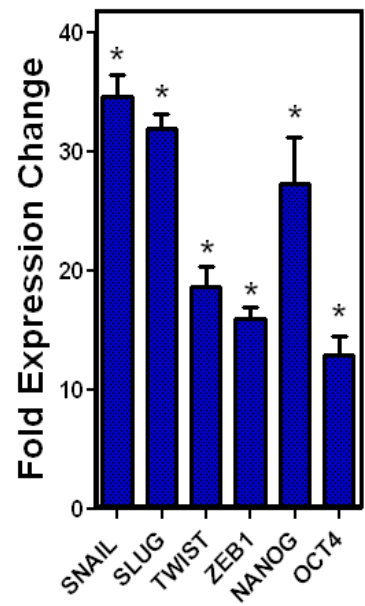

**C.**

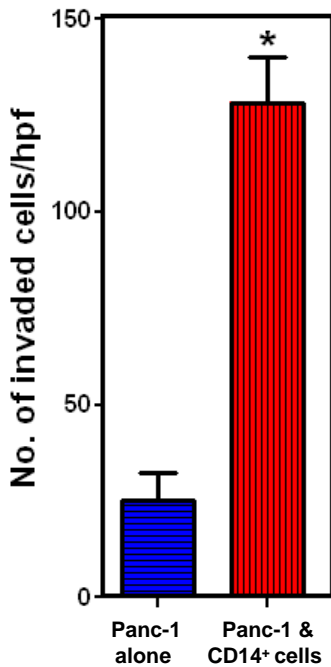

**D.**

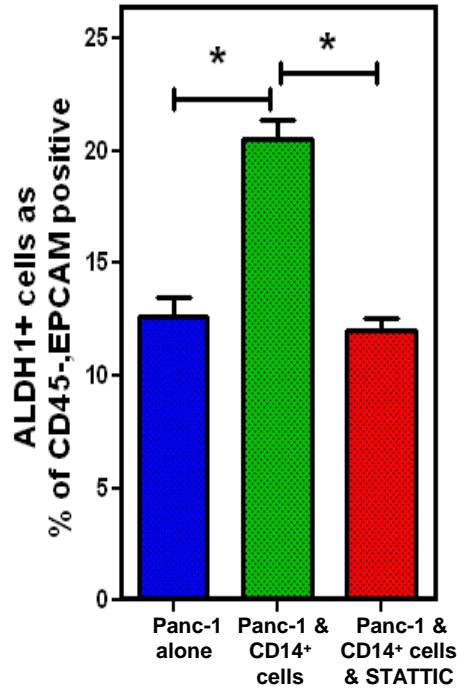

**E.**

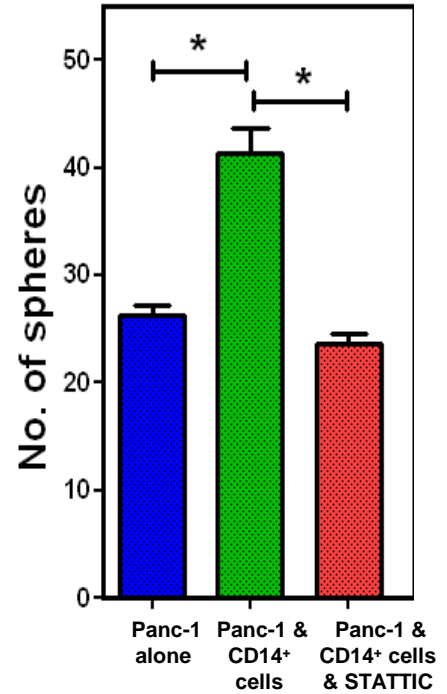

### Supplementary figure 9:

A. CD14<sup>+</sup>/HLA-DR<sup>low/-</sup> cells were co-cultured with Panc-1 for 72 hours and ALDH1, CD24 and CD44 staining was performed. Graph shows ALDH1<sup>Bright</sup> CSCs and CD24<sup>+</sup>, CD44<sup>+</sup> cells as a percentage of CD45<sup>-</sup>, EpCAM<sup>+</sup>, PI<sup>-</sup> cells.

B. Tumor EMT Markers: RT-PCR shows that markers of cell pluripotency and EMT were upregulated in Panc-1 tumor cells after co-culture with CD14<sup>+</sup>/HLA-DR<sup>low/-</sup> cells.

C. Graph for invasion assays showing that Panc-1 tumor cells have increased invasion through matrigel matrix membrane in the presence of CD14<sup>+</sup> cells relative to tumor cells alone. Cells per high power field were quantified. Graph depicts the number of invaded cells per high powered field (mean ± S.E.M of three independent experiments).

D. Inhibition of STAT3 signaling in CD14<sup>+</sup>/HLA-DR<sup>low/-</sup> cells prevents the increase in ALDH1<sup>Bright</sup> CSCs in Panc-1 from baseline. Representative flow-cytometry plots show ALDH1<sup>Bright</sup> CSC population (gated on CD45<sup>-</sup>, EpCAM<sup>+</sup>, PI<sup>-</sup> cells) which is approximately 13.5% in Panc-1 alone, 20.8% when Panc-1 was co-cultured with CD14<sup>+</sup>/HLA-DR<sup>low/-</sup> cells and 12.02% when Panc-1 was co-cultured with STATTIC treated CD14<sup>+</sup>/HLA-DR<sup>low/-</sup> cells. Graph shows that inhibition of STAT3 signaling by STATTIC (20μM) blocks the increase in frequency of ALDH1<sup>Bright</sup> cells from baseline.

E. Bar graph shows tumor spheroid formation in Panc-1 cells with and without CD14<sup>+</sup>/HLA-DR<sup>low/-</sup> cells in the co-culture. The mean number of tumor spheroids formatted after 10 days is depicted.

Panni et. al.

Supplementary Figure 10

pSTAT3 IN CD11b+ CELLS AFTER CO-CULTURE WITH TUMOR CELLS (KCM)

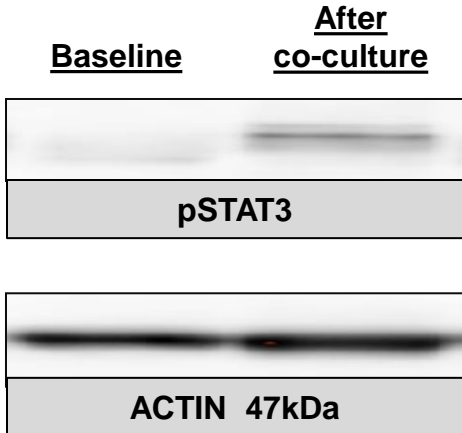

**Supplementary Figure 10:**

Western blot analysis shows increased phosphorylated STAT3 in CD11b<sup>+</sup> cells after co-culture with murine tumor cells (KCM).

IL-6 LEVELS IN CD14<sup>+</sup> CELLS WITH  
STAT3 INHIBITION

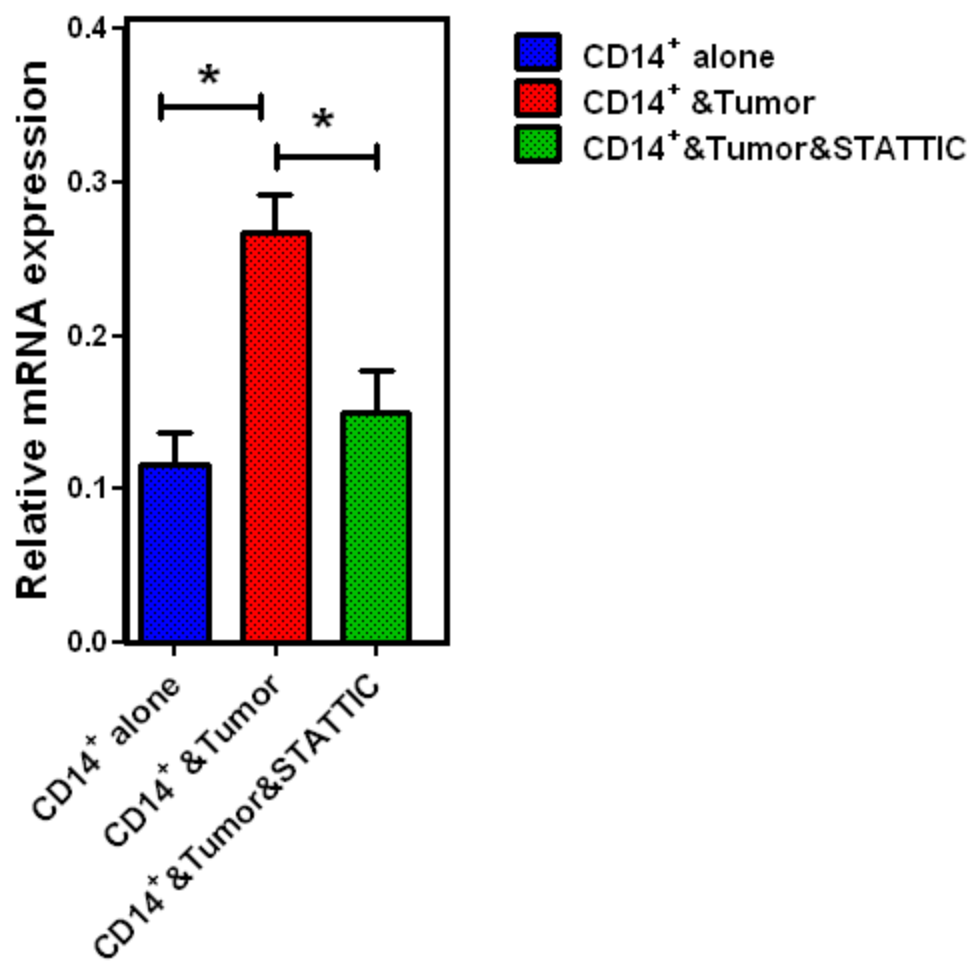

**Supplementary Figure 11:**

Inhibition of STAT3 signaling by STATTIC (20uM) downregulates the expression of IL-6 in tumor conditioned CD14<sup>+</sup>/HLA-DR<sup>low/-</sup> cells by RT-PCR.

Bar graph depicts mean $\pm$  SEM and asterisk (\*) denotes statistically significant difference between the two groups p<0.05 by Mann-Whitney test.
